# Supplementary material for: Potential association of pulmonary tuberculosis with genetic polymorphisms of toll-like receptor 9 and interferon-gamma in a Chinese population
Source: PubMed Central journal article supplement (PMC3819710; doi:10.1186/1471-2334-13-511), 2013-10-31
Supplement: 1471-2334-13-511-S3.pdf [file 1471-2334-13-511-S3.pdf]

**Additional file 2. The association of selected SNPs with the development of pulmonary tuberculosis (Part 1/4)**

| Genotype                         |           | PTB patients | LTBI controls | Adjusted OR* (95% CI), p value | PTB patients | Healthy controls | Adjusted OR* (95% CI), p value |
|----------------------------------|-----------|--------------|---------------|--------------------------------|--------------|------------------|--------------------------------|
| IL1RN<br>9589 A/T<br>(rs454078)  | TT        | 170          | 169           | Ref.                           | 170          | 173              | Ref.                           |
|                                  | TA        | 29           | 28            | 1.03 (0.59-1.82), p=0.908      | 29           | 23               | 1.29 (0.71-2.32), p=0.402      |
|                                  | AA        | 1            | 0             | NA                             | 1            | 0                | NA                             |
|                                  | Dominant  | AA+TA vs TT  |               | 1.07 (0.61-1.88), p=0.819      |              |                  | 1.33 (0.74-2.39), p=0.340      |
|                                  | Recessive | AA vs TA+TT  |               | NA                             |              |                  | NA                             |
| IL1B<br>-511 C/T<br>(rs16944)    | CC        | 54           | 63            | Ref.                           | 54           | 59               | Ref.                           |
|                                  | CT        | 96           | 97            | 1.15 (0.73-1.83), p=0.541      | 96           | 99               | 1.06 (0.67-1.69), p=0.807      |
|                                  | TT        | 50           | 37            | 1.58 (0.90-2.77), p=0.109      | 50           | 38               | 1.44 (0.82-2.52), p=0.204      |
|                                  | Dominant  | TT+CT vs CC  |               | 1.45 (0.89-2.34), p=0.134      |              |                  | 1.39 (0.86-2.23), p=0.179      |
|                                  | Recessive | TT vs CT+CC  |               | 1.27 (0.83-1.96), p=0.117      |              |                  | 1.17 (0.75-1.80), p=0.494      |
| IL2<br>-330 T/G<br>(rs2069762)   | TT        | 89           | 90            | Ref.                           | 89           | 87               | Ref.                           |
|                                  | TG        | 88           | 85            | 1.05 (0.69-1.59), p=0.831      | 88           | 88               | 0.98 (0.64-1.48), p=0.913      |
|                                  | GG        | 23           | 22            | 1.06 (0.55-2.03), p=0.867      | 23           | 21               | 1.07 (0.55-2.09), p=0.835      |
|                                  | Dominant  | GG+TG vs TT  |               | 1.05 (0.71-1.56), p=0.813      |              |                  | 1.00 (0.67-1.48), p=0.982      |
|                                  | Recessive | GG vs TG+TT  |               | 1.03 (0.56-1.93), p=0.916      |              |                  | 1.09 (0.58-2.04), p=0.798      |
| IL4<br>-589 C/T<br>(rs2243250)   | TT        | 120          | 106           | Ref.                           | 120          | 105              | Ref.                           |
|                                  | TC        | 70           | 79            | 0.78 (0.52-1.18), p=0.246      | 70           | 77               | 0.80 (0.52-1.21), p=0.282      |
|                                  | CC        | 10           | 12            | 0.73 (0.30-1.77), p=0.489      | 10           | 14               | 0.63 (0.27-1.47), p=0.280      |
|                                  | Dominant  | CC+TC vs TT  |               | 0.78 (0.52-1.16), p=0.631      |              |                  | 0.77 (0.52-1.15), p=0.197      |
|                                  | Recessive | CC vs TC+TT  |               | 0.81 (0.34-1.93), p=0.212      |              |                  | 0.69 (0.30-1.58), p=0.375      |
| IL8<br>-251 T/A<br>(rs4073)      | AA        | 74           | 75            | Ref.                           | 74           | 68               | Ref.                           |
|                                  | AT        | 97           | 93            | 1.06 (0.69-1.63), p=0.796      | 97           | 99               | 0.90 (0.58-1.39), p=0.636      |
|                                  | TT        | 29           | 29            | 1.01 (0.55-1.86), p=0.966      | 29           | 29               | 0.92 (0.50-1.70), p=0.788      |
|                                  | Dominant  | TT+AT vs AA  |               | 1.05 (0.70-1.57), p=0.823      |              |                  | 0.91 (0.60-1.37), p=0.634      |
|                                  | Recessive | TT vs AT+AA  |               | 0.98 (0.56-1.72), p=0.949      |              |                  | 0.98 (0.56-1.71), p=0.935      |
| IL8RB<br>1208 C/T<br>(rs1126579) | TT        | 83           | 83            | Ref.                           | 83           | 78               | Ref.                           |
|                                  | TC        | 85           | 82            | 1.04 (0.67-1.59), p=0.871      | 85           | 88               | 0.91 (0.59-1.40), p=0.656      |
|                                  | CC        | 32           | 32            | 1.00 (0.56-1.79), p=0.998      | 32           | 30               | 1.00 (0.55-1.81), p=0.998      |
|                                  | Dominant  | CC+TC vs TT  |               | 1.03 (0.69-1.53), p=0.899      |              |                  | 0.93 (0.62-1.39), p=0.724      |
|                                  | Recessive | CC vs TC+TT  |               | 0.98 (0.57-1.68), p=0.951      |              |                  | 1.05 (0.61-1.82), p=0.850      |
| IL10<br>-819 T/C<br>(rs1800871)  | TT        | 99           | 83            | Ref.                           | 99           | 81               | Ref.                           |
|                                  | TC        | 80           | 94            | 0.71 (0.47-1.08), p=0.113      | 80           | 87               | 0.75 (0.49-1.15), p=0.182      |
|                                  | CC        | 21           | 20            | 0.88 (0.45-1.74), p=0.712      | 21           | 28               | 0.62 (0.33-1.16), p=0.134      |
|                                  | Dominant  | CC+TC vs TT  |               | 0.72 (0.50-1.10), p=0.141      |              |                  | 0.71 (0.48-1.06), p=0.099      |
|                                  | Recessive | CC vs TC+TT  |               | 1.04 (0.54-1.99), p=0.908      |              |                  | 0.70 (0.38-1.29), p=0.256      |
| IL10<br>-1082 A/G<br>(rs1800896) | AA        | 176          | 162           | Ref.                           | 176          | 160              | Ref.                           |
|                                  | AG        | 23           | 35            | 0.60 (0.34-1.07), p=0.082      | 23           | 35               | 0.60 (0.34-1.05), p=0.075      |
|                                  | GG        | 1            | 0             | NA                             | 1            | 1                | 0.91 (0.06-14.69), p=0.945     |
|                                  | Dominant  | GG+AG vs AA  |               | 0.63 (0.36-1.11), p=0.108      |              |                  | 0.61 (0.35-1.06), p=0.078      |
|                                  | Recessive | GG vs AG+AA  |               | NA                             |              |                  | 0.98 (0.06-15.82), p=0.988     |

Abbreviation: CI, confidence interval; LTBI, latent M. tuberculosis infection; NA, not available; OR, odds ratio; PTB, pulmonary tuberculosis; SNP, single nucleotide polymorphism; TB, tuberculosis.

\* Adjusted for age and gender.

**Additional file 2. The association of selected SNPs with the development of pulmonary tuberculosis (Part 2/4)**

| Genotype                          |           | PTB patients | LTBI controls | Adjusted OR* (95% CI), p value | PTB patients | Healthy controls | Adjusted OR* (95% CI), p value |
|-----------------------------------|-----------|--------------|---------------|--------------------------------|--------------|------------------|--------------------------------|
| IL18<br>-137 G/C<br>(rs187238)    | CC        | 157          | 147           | Ref.                           | 157          | 152              | Ref.                           |
|                                   | CG        | 40           | 46            | 0.81 (0.50-1.32), p=0.399      | 40           | 42               | 0.92 (0.57-1.50), p=0.745      |
|                                   | GG        | 3            | 4             | 0.70 (0.15-3.20), p=0.647      | 3            | 2                | 1.45 (0.24-8.82), p=0.685      |
|                                   | Dominant  | GG+CG vs CC  |               | 0.80 (0.50-1.28), p=0.361      |              |                  | 0.95 (0.59-1.53), p=0.821      |
|                                   | Recessive | GG vs CG+CC  |               | 0.73 (0.16-3.34), p=0.689      |              |                  | 1.48 (0.24-8.94), p=0.671      |
| IL18<br>-607 A/C<br>(rs1946518)   | CC        | 58           | 50            | Ref.                           | 58           | 49               | Ref.                           |
|                                   | CA        | 99           | 101           | 0.84 (0.53-1.35), p=0.479      | 99           | 101              | 0.83 (0.51-1.32), p=0.427      |
|                                   | AA        | 43           | 46            | 0.80 (0.46-1.41), p=0.448      | 43           | 46               | 0.79 (0.45-1.39), p=0.409      |
|                                   | Dominant  | AA+CA vs CC  |               | 0.83 (0.53-1.30), p=0.416      |              |                  | 0.81 (0.52-1.27), p=0.365      |
|                                   | Recessive | AA vs CA+CC  |               | 0.90 (0.56-1.44), p=0.656      |              |                  | 0.89 (0.55-1.43), p=0.637      |
| TLR1<br>-7202 A/G<br>(rs5743551)  | GG        | 90           | 90            | Ref.                           | 90           | 74               | Ref.                           |
|                                   | GA        | 84           | 91            | 0.91 (0.60-1.38), p=0.663      | 84           | 103              | 0.66 (0.43-1.01), p=0.055      |
|                                   | AA        | 25           | 16            | 1.55 (0.77-3.10), p=0.216      | 25           | 19               | 1.06 (0.54-2.01), p=0.850      |
|                                   | Dominant  | AA+GA vs GG  |               | 1.01 (0.68-1.50), p=0.969      |              |                  | 0.72 (0.48-1.08), p=0.116      |
|                                   | Recessive | AA vs GA+GG  |               | 1.62 (0.83-3.14), p=0.154      |              |                  | 1.33 (0.71-2.51), p=0.377      |
| TLR2<br>597 C/T<br>(rs3804099)    | TT        | 97           | 102           | Ref.                           | 97           | 97               | Ref.                           |
|                                   | TC        | 83           | 73            | 1.20 (0.79-1.82), p=0.404      | 83           | 81               | 1.03 (0.68-1.56), p=0.905      |
|                                   | CC        | 20           | 22            | 0.96 (0.49-1.86), p=0.895      | 20           | 18               | 1.11 (0.55-2.24), p=0.764      |
|                                   | Dominant  | CC+TC vs TT  |               | 1.14 (0.77-1.69), p=0.514      |              |                  | 1.04 (0.70-1.55), p=0.841      |
|                                   | Recessive | CC vs TC+TT  |               | 0.88 (0.47-1.68), p=0.705      |              |                  | 1.10 (0.56-2.15), p=0.781      |
| TLR5<br>1174 C/T<br>(rs5744168)   | CC        | 189          | 189           | Ref.                           | 189          | 188              | Ref.                           |
|                                   | CT        | 11           | 8             | 1.38 (0.54-3.50), p=0.504      | 11           | 7                | 1.57 (0.60-4.14), p=0.361      |
|                                   | TT        | 0            | 0             | NA                             | 0            | 0                | NA                             |
|                                   | Dominant  | TT+CT vs CC  |               | 1.38 (0.54-3.50), p=0.504      |              |                  | 1.57 (0.60-4.14), p=0.361      |
|                                   | Recessive | TT vs CT+CC  |               | NA                             |              |                  | NA                             |
| CCR2<br>190 A/G<br>(rs1799864)    | GG        | 125          | 125           | Ref.                           | 125          | 120              | Ref.                           |
|                                   | GA        | 62           | 65            | 0.95 (0.62-1.46), p=0.829      | 62           | 67               | 0.89 (0.58-1.37), p=0.590      |
|                                   | AA        | 13           | 7             | 1.87 (0.72-4.87), p=0.200      | 13           | 9                | 1.39 (0.57-3.37), p=0.469      |
|                                   | Dominant  | AA+GA vs GG  |               | 1.04 (0.69-1.57), p=0.842      |              |                  | 0.95 (0.63-1.43), p=0.797      |
|                                   | Recessive | AA vs GA+GG  |               | 1.90 (0.74-4.90), p=0.184      |              |                  | 1.45 (0.60-3.47), p=0.408      |
| CCR5<br>59029 A/G<br>(rs1799987)  | GG        | 71           | 62            | Ref.                           | 71           | 59               | Ref.                           |
|                                   | GA        | 97           | 107           | 0.79 (0.51-1.23), p=0.293      | 97           | 102              | 0.79 (0.51-1.23), p=0.590      |
|                                   | AA        | 32           | 28            | 1.00 (0.54-1.85), p=0.997      | 32           | 35               | 0.76 (0.42-1.37), p=0.469      |
|                                   | Dominant  | AA+GA vs GG  |               | 0.83 (0.55-1.27), p=0.396      |              |                  | 0.78 (0.51-1.19), p=0.251      |
|                                   | Recessive | AA vs GA+GG  |               | 1.15 (0.669-2.00), p=0.616     |              |                  | 0.88 (0.52-1.48), p=0.623      |
| RANTES<br>-403 G/A<br>(rs2107538) | GG        | 77           | 63            | Ref.                           | 77           | 74               | Ref.                           |
|                                   | GA        | 96           | 101           | 0.78 (0.50-1.20), p=0.256      | 96           | 95               | 0.97 (0.64-1.49), p=0.893      |
|                                   | AA        | 27           | 33            | 0.67 (0.36-1.23), p=0.195      | 27           | 27               | 0.96 (0.52-1.79), p=0.901      |
|                                   | Dominant  | AA+GA vs GG  |               | 0.75 (0.50-1.14), p=0.174      |              |                  | 0.97 (0.65-1.46), p=0.879      |
|                                   | Recessive | AA vs GA+GG  |               | 0.78 (0.45-1.35), p=0.366      |              |                  | 0.98 (0.55-1.74), p=0.938      |

Abbreviation: CI, confidence interval; LTBI, latent M. tuberculosis infection; NA, not available; OR, odds ratio; PTB, pulmonary tuberculosis; SNP, single nucleotide polymorphism; TB, tuberculosis.

\* Adjusted for age and gender.

**Additional file 2. The association of selected SNPs with the development of pulmonary tuberculosis (Part 3/4)**

| Genotype                                 |           | PTB patients | LTBI controls | Adjusted OR* (95% CI), p value | PTB patients | Healthy controls | Adjusted OR* (95% CI), p value |
|------------------------------------------|-----------|--------------|---------------|--------------------------------|--------------|------------------|--------------------------------|
| MCP1<br>2518 A/G<br>(rs1024611)          | GG        | 71           | 64            | Ref.                           | 71           | 75               | Ref.                           |
|                                          | GA        | 96           | 104           | 0.83 (0.54-1.29), p=0.408      | 96           | 88               | 1.15 (0.75-1.78), p=0.524      |
|                                          | AA        | 33           | 29            | 1.02 (0.56-1.88), p=0.941      | 33           | 33               | 1.06 (0.59-1.89), p=0.856      |
|                                          | Dominant  | AA+GA vs GG  |               | 0.87 (0.57-1.33), p=0.522      |              |                  | 1.13 (0.75-1.69), p=0.571      |
|                                          | Recessive | AA vs GA+GG  |               | 1.14 (0.66-1.97), p=0.627      |              |                  | 0.98 (0.57-1.65), p=0.926      |
| NRAMP1<br>D543N<br>(rs17235409)          | GG        | 151          | 151           | Ref.                           | 151          | 139              | Ref.                           |
|                                          | GA        | 47           | 43            | 1.09 (0.68-1.76), p=0.710      | 47           | 55               | 0.79 (0.50-1.24), p=0.295      |
|                                          | AA        | 2            | 3             | 0.67 (0.11-4.06), p=0.661      | 2            | 2                | 0.93 (0.13-6.74), p=0.945      |
|                                          | Dominant  | AA+GA vs GG  |               | 1.07 (0.67-1.70), p=0.785      |              |                  | 0.79 (0.51-1.24), p=0.302      |
|                                          | Recessive | AA vs GA+GG  |               | 0.65 (0.11-3.96), p=0.643      |              |                  | 0.99 (0.14-7.12), p=0.989      |
| P2X7<br>1513 A/C<br>(rs3751143)          | AA        | 116          | 113           | Ref.                           | 116          | 109              | Ref.                           |
|                                          | AC        | 76           | 71            | 1.04 (0.69-1.58), p=0.850      | 76           | 76               | 0.94 (0.62-1.42), p=0.767      |
|                                          | CC        | 8            | 13            | 0.60(0.24-1.50), p=0.270       | 8            | 11               | 0.68 (0.27-1.77), p=0.431      |
|                                          | Dominant  | CC+ACvs AA   |               | 0.97 (0.65-1.45), p=0.894      |              |                  | 0.91 (0.61-1.35), p=0.632      |
|                                          | Recessive | CC vs AC+AA  |               | 0.59 (0.24-1.45), p=0.247      |              |                  | 0.70 (0.28-1.78), p=0.456      |
| P2X7<br>-762 T/C<br>(rs2393799)          | TT        | 92           | 86            | Ref.                           | 92           | 86               | Ref.                           |
|                                          | TC        | 81           | 86            | 0.87 (0.57-1.33), p=0.521      | 81           | 88               | 0.85 (0.56-1.30), p=0.458      |
|                                          | CC        | 26           | 25            | 0.96 (0.52-1.79), p=0.900      | 26           | 42               | 1.10 (0.58-2.08), p=0.784      |
|                                          | Dominant  | CC+TC vs TT  |               | 0.89 (0.60-1.33), p=0.569      |              |                  | 0.90 (0.61-1.34), p=0.604      |
|                                          | Recessive | CC vs TC+TT  |               | 1.03 (0.57-1.85), p=0.928      |              |                  | 1.18 (0.65-2.17), p=0.586      |
| TNF- $\alpha$<br>-308 G/A<br>(rs1800629) | GG        | 169          | 178           | Ref.                           | 169          | 176              | Ref.                           |
|                                          | GA        | 29           | 18            | 1.71 (0.91-3.20), p=0.095      | 29           | 19               | 1.60 (0.86-2.96), p=0.138      |
|                                          | AA        | 2            | 1             | 2.14 (0.19-23.99), p=0.573     | 2            | 1                | 2.07 (0.19-23.15), p=0.553     |
|                                          | Dominant  | AA+GA vs GG  |               | 1.73 (0.94-3.19), p=0.080      |              |                  | 1.62 (0.89-2.96), p=0.116      |
|                                          | Recessive | AA vs GA+GG  |               | 1.98 (0.18-22.17), p=0.579     |              |                  | 1.96 (0.18-21.88), p=0.583     |
| CD4<br>868 C/T<br>(rs28919570)           | CC        | 188          | 185           | Ref.                           | 188          | 184              | Ref.                           |
|                                          | CT        | 11           | 12            | 0.90 (0.39-2.10), p=0.810      | 11           | 12               | 0.90 (0.39-2.09), p=0.802      |
|                                          | TT        | 1            | 0             | NA                             | 1            | 0                | NA                             |
|                                          | Dominant  | TT+CT vs CC  |               | 0.98 (0.43-2.25), p=0.970      |              |                  | 0.98 (0.43-2.24), p=0.962      |
|                                          | Recessive | TT vs CT+CC  |               | NA                             |              |                  | NA                             |
| CD14<br>159 C/T<br>(rs2569190)           | TT        | 54           | 66            | Ref.                           | 54           | 60               | Ref.                           |
|                                          | TC        | 103          | 97            | 1.28 (0.81-2.01), p=0.293      | 103          | 104              | 1.08 (0.68-1.70), p=0.745      |
|                                          | CC        | 42           | 34            | 1.48 (0.83-2.64), p=0.181      | 42           | 32               | 1.43 (0.80-2.58), p=0.229      |
|                                          | Dominant  | CC+TC vs TT  |               | 1.33 (0.87-2.04), p=0.194      |              |                  | 1.16 (0.75-1.80), p=0.497      |
|                                          | Recessive | CC vs TC+TT  |               | 1.27 (0.77-2.11), p=0.344      |              |                  | 1.36 (0.82-2.28), p=0.231      |
| MBL<br>-221 G/C<br>(rs7096206)           | CC        | 150          | 150           | Ref.                           | 150          | 141              | Ref.                           |
|                                          | CG        | 48           | 45            | 1.06 (0.67-1.70), p=0.785      | 48           | 52               | 0.87 (0.55-1.37), p=0.542      |
|                                          | GG        | 2            | 2             | 1.00 (0.14-7.23), p=0.999      | 2            | 3                | 0.63 (0.10-3.82), p=0.612      |
|                                          | Dominant  | GG+CG vs CC  |               | 1.07 (0.67-1.69), p=0.790      |              |                  | 0.86 (0.55-1.34), p=0.493      |
|                                          | Recessive | GG vs CG+CC  |               | 0.99 (0.14-7.10), p=0.990      |              |                  | 0.65 (0.11-3.94), p=0.640      |

Abbreviation: CI, confidence interval; LTBI, latent M. tuberculosis infection; NA, not available; OR, odds ratio; PTB, pulmonary tuberculosis; SNP, single nucleotide polymorphism; TB, tuberculosis.

\* Adjusted for age and gender.

**Additional file 2. The association of selected SNPs with the development of pulmonary tuberculosis (Part 4/4)**

| Genotype                          |           | PTB patients | LTBI controls | Adjusted OR* (95% CI), p value | PTB patients | Healthy controls | Adjusted OR* (95% CI), p value |
|-----------------------------------|-----------|--------------|---------------|--------------------------------|--------------|------------------|--------------------------------|
| TIRAP<br>539 C/T<br>(rs8177374)   | CC        | 196          | 190           | Ref.                           | 196          | 188              | Ref.                           |
|                                   | CT        | 4            | 7             | 0.55 (0.16-1.92), p=0.352      | 4            | 7                | 0.55 (0.16-1.91), p=0.348      |
|                                   | TT        | 0            | 0             | NA                             | 0            | 0                | NA                             |
|                                   | Dominant  | TT+CT vs CC  |               | 0.55 (0.16-1.92), p=0.352      |              |                  | 0.55 (0.16-1.91), p=0.348      |
|                                   | Recessive | TT vs CT+CC  |               | NA                             |              |                  | NA                             |
| NFKBIA<br>-881 A/G<br>(rs3138053) | AA        | 150          | 148           | Ref.                           | 150          | 153              | Ref.                           |
|                                   | AG        | 48           | 47            | 1.01 (0.63-1.60), p=0.975      | 48           | 43               | 1.14 (0.71-1.82), p=0.591      |
|                                   | GG        | 2            | 2             | 0.99 (0.14-7.10), p=0.989      | 2            | 0                | NA                             |
|                                   | Dominant  | TT+AG vs GG  |               | 1.01 (0.64-1.59), p=0.977      |              |                  | 1.19 (0.74-1.89), p=0.474      |
|                                   | Recessive | TT vs AG+GG  |               | 0.98 (0.14-7.06), p=0.988      |              |                  | NA                             |
| NFKBIA<br>-826 C/T<br>(rs2233406) | GG        | 149          | 148           | Ref.                           | 149          | 153              | Ref.                           |
|                                   | GA        | 48           | 47            | 1.01 (0.63-1.60), p=0.975      | 48           | 43               | 1.14 (0.71-1.82), p=0.591      |
|                                   | AA        | 2            | 2             | 0.99 (0.14-7.10), p=0.989      | 2            | 0                | NA                             |
|                                   | Dominant  | AA+GA vs GG  |               | 1.01 (0.64-1.59), p=0.977      |              |                  | 1.02 (0.68-1.53), p=0.474      |
|                                   | Recessive | AA vs GA+GG  |               | 0.98 (0.14-7.06), p=0.988      |              |                  | NA                             |

Abbreviation: CI, confidence interval; LTBI, latent M. tuberculosis infection; NA, not available; OR, odds ratio; PTB, pulmonary tuberculosis; SNP, single nucleotide polymorphism; TB, tuberculosis.

\* Adjusted for age and gender.
